# **Wild Wheat Introgression Promotes Temporal Water fluxes Dynamics under Terminal Drought Stress through Plant-Atmospheric Interrelations**

**Harel Bacher<sup>1,2</sup>, Yoav Sharaby<sup>1</sup>, Harkamal Walia<sup>2,\*</sup>, Zvi Peleg<sup>1,\*</sup>**

<sup>1</sup>The Robert H. Smith Institute of Plant Sciences and Genetics in Agriculture, The Hebrew University of Jerusalem, Rehovot, Israel.

<sup>2</sup>Department of Agronomy and Horticulture, University of Nebraska-Lincoln, Lincoln, NE, USA.

†To whom correspondence should be addressed:

Zvi Peleg,

The Robert H. Smith Institute of Plant Sciences and Genetics in Agriculture,

The Hebrew University of Jerusalem,

Rehovot 7610001, Israel.

Tel.: +972-8-9489638

E-mail: [zvi.peleg@mail.huji.ac.il](mailto:zvi.peleg@mail.huji.ac.il)

Harkamal Walia,

Department of Agronomy and Horticulture,

University of Nebraska-Lincoln,

Lincoln, NE, USA.

Tel.: +1-402-4721162

E-mail: [hwalia2@unl.edu](mailto:hwalia2@unl.edu)

## Abstract

The intensity of water stress experienced by plants depends upon soil moisture status as well as atmospheric variables such as temperature, radiation, and air vapour pressure deficit (VPD). Although the role of shoot architecture with these edaphic and atmospheric factors is well-studied, the extent to shoot and root dynamic interactions as a continuum are controlled by genotypic variation is less known. Here, we targeted these interactions using a wild emmer introgression line (IL20) with a distinct drought-induced shift in the shoot-to-root ratio and its drought-sensitive recurrent parent Svevo. Using a gravimetric platform, we show that IL20 maintained higher root water influx and gas exchange under terminal drought, which supported a greater growth. Interestingly, the advantage of IL20 in root influx and transpiration was expressed earlier during the daily diurnal cycle under lower VPD and therefore supported higher transpiration efficiency. Application of structural equation model indicates that under water-stress, VPD and radiation are antagonistic to transpiration rate, whereas the root water influx operates as feedback for the higher atmospheric responsiveness of leaves. Collectively, these results suggest that a drought-induced shift in root-to-shoot ratio can improve plant water uptake potential in a short preferable time window determined by both water and atmospheric parameters.

**Keywords:** Gas exchange, root influx, terminal drought, transpiration, VPD, wild emmer wheat

## Introduction

Wheat grown under Mediterranean-like climatic conditions are exposed to short, wet winter months and develop during the spring and early summer as precipitation declines rapidly and temperatures rise. In this scenario, plant productivity is limited by terminal drought (Turner, 2004). Such stress is a consequence of not only precipitation distribution but also soil properties (*i.e.*, texture and structure) and atmospheric variables (*i.e.*, temperatures, relative humidity, and air vapour pressure deficit [VPD]) (Anderson *et al.*, 1992; Rashid *et al.*, 2018; Ihsan *et al.*, 2016). Under such conditions, the plant's ability to cope with the associated hydraulic constraints and maintain the soil–plant–atmosphere continuum (*i.e.*, SPAC; Passioura, 1982) is mediated by various adaptive mechanisms. In general, water flows down potential gradients from the soil matrix to the leaf and evaporates through the stomata. Water stress can result in a breakdown of this continuum and may lead to hydraulic failure. Plants can regulate water loss by modulating the stomatal aperture as part of a short-term response to water limitation and through alteration of root system architecture as part of longer duration water stress (Sperry *et al.*, 2002; Koevoets *et al.*, 2016; Mansfield *et al.*, 1990).

The root system architecture (*i.e.*, root length and spatial distribution), as well as its anatomical and hydraulic properties, regulates plant water flow and maintains the whole plant water balance (Vandeleur *et al.*, 2014; Sivasakthi *et al.*, 2017). Root hydraulic conductance amplitudes follow the daily circadian rhythm which leads to higher conductance during the night and early morning when plant demand is lowest. During the afternoon, when plants lose their turgor and the evaporative demand is high due to atmospheric effects, plant conductance decreases significantly (Caldeira *et al.*, 2014). The intensity of this diel pattern increases under water stress or high evaporative demand, which indicates the adaptive nature of this mechanism, optimizing water use efficiency.

The complex array of aboveground and belowground tissue interactions is strongly related to atmospheric diurnal variations. One of the main driving forces of transpiration rate is the VPD (Monteith, 1995; Lobell *et al.*, 2014). In response to water stress, high VPD, or their combination, the plant will increase or limit its water use. While the first will continue to exhaust its water residuals, the second will reduce its stomatal conductance thereby decreasing transpiration and carbon fixation rate, and eventually shrinking the relative growth rate. These two strategies can be interpreted as phenotypic stability and plasticity responses, respectively (Nicotra *et al.*, 2010; Bacher *et al.*, 2021). Under water stress, plants that exhibit plasticity

responses by limiting their maximum rate of transpiration would show beneficial effects on productivity as a result of greater water-saving and higher transpiration efficiency (TE) (Tanner and Sinclair, 1983).

Under rainfed agro-systems, wheat plants that can enhance their root system can exhaust the water residuals with higher efficiency (Voss-Fels *et al.*, 2018). At the same time, smaller aboveground tissues will prevent excessive water loss due to lower shoot transpiration areas. Recently we evaluated a large set of wild emmer wheat introgression lines under well-watered and water-limited conditions and identified a specific IL that harbours a high phenotypic plasticity response to water stress resulting from a significant shift in the root-to-shoot ratio (Bacher *et al.*, 2021). Here, we have applied a physiological approach using gravity lysimeters with water, soil, and atmospheric sensors to dissect the interactions between the two genotypes water-stress response mechanisms and its environmental cues. We hypothesize that the drought-induced alteration in the root-to-shoot ratio can support the water influx continuum under sub-optimal atmospheric conditions. Our specific aims were to *i*) characterize the physiological mechanism associated with whole-plant water flux, and *ii*) dissect the effect of genotypic-atmospheric–physiological interrelations on the water influx continuum under terminal drought. Our results indicate that the IL’s adaptation to the atmospheric state under terminal drought enhances transpiration efficiency. This is mediated by higher root influx during the early morning when VPD is low and is coupled to higher canopy conductance and growth.

## Material and methods

### *Plant material*

Two genotypes with contrasting drought responsiveness were selected for the current study, durum wheat cultivar Svevo (sensitive) and wild emmer wheat introgression line IL20 (adaptive). Svevo is an elite Italian durum wheat cultivar released in 1996 (CIMMYT line/Zenit) and considered as a reference for the quality and productivity of durum wheat. IL20 (BC<sub>3</sub>F<sub>5</sub>) consists of multiple (mapped) wild introgressions on five chromosomes (1A, 1B, 2A, 4A, 5B) accounting for ~4.5% of the accession Zavitan genome in Svevo. IL20 was selected from a set of ILs for its striking shift in the root-to-shoot ratio in response to water stress during the vegetative growth stage (Bacher *et al.*, 2021).

### *Lysimetric experiment- growth conditions*

The experiment was conducted in the iCORE Center for Functional Phenotyping of Whole-Plant Responses to Environmental Stresses, the Hebrew University of Jerusalem, Rehovot, Israel, equipped with functional phenotyping gravimetric system, PlantArray 3.0 lysimeter system (Plant-DiTech, Rehovot, Israel).

Uniform seeds of Svevo and IL20 were surface disinfected (1% sodium hypochlorite for 30 minutes) and placed in Petri dishes on moist germination paper (Anchor Paper Co., St. Paul, MN, USA) about 3 cm apart, at 24°C in the dark for 5 days. Uniform seedlings from each line were transplanted into cavity trays with potting soil, one seedling per cavity, and grown for seven days. Seedlings were then transplanted to 4-liter pots (one seedling per pot) filled with 2.8 kg fine silica sand 75-90 (Negev Industrial Minerals Ltd., Israel). Each pot was immersed in a plastic container through a hole in its top cover. Evaporation from the containers and pots was prevented by a plastic plate cover, punched in the middle. Pots were placed under semi-controlled temperature conditions, with natural day length and light intensity (Supplementary Fig. S1). Each pot was placed on a load cell with a digital output generated every three minutes (Dalal *et al.*, 2020). Each plant was irrigated by four on-surface drippers to ensure uniform water distribution in the pots at the end of the irrigation event and prior to drainage. Plants were irrigated in three consecutive cycles, between 23:00 and 02:00. The daily predawn pot weight was determined as the average weight between 05:00 and 05:30 h after ensuring that all excessive water was drained from the pot (Dalal *et al.*, 2020).

The temperature and relative humidity in the greenhouse and the photosynthetically active radiation were monitored using an HC2-S3-L Meteo probe (Rotronic, Crawley, UK) and LI-COR 190 Quantum Sensor (Lincoln, NE, USA). The weighing lysimeters, soil-moisture sensors, and environmental sensors were connected to a CR1000 data logger through AM16/32B multiplexers (Campbell Scientific, Logan, UT, USA). Readings of the environmental sensors were taken every 15 sec and averaged for each 3-min period. The data were stored in a data logger for further analysis. Soil moisture was measured every 3 min.

### *Lysimetric experiment- experimental design*

Plants were grown under optimal conditions for 25 days (Zadoks growth stage 12; Zadoks *et al.*, 1974) and then divided into two groups, well-watered (WW) and terminal drought (TD)

treatments, that were gradually applied over nine days. Under the TD, each plant was irrigated individually based on a 20% reduction from its previous day's transpiration, so that all plants were exposed to controlled drought treatment according to individual plant water demands. All plants were harvested 35 days after transplanting (booting stage; Zadoks growth stage 45; Zadoks *et al.*, 1974) and oven-dried for 8 days at 80°C for dry weight measurements. Volumetric water content (VWC) of both genotypes under a specific water treatment was measured by using time-domain reflectometry (TDR) (5TE; Decagon Devices, Pullman, WA, USA).

#### *Whole-canopy weight and gas exchange measurements- lysimetric experiment*

A full description of the physiological measurements methodology for the lysimetric system was previously described (Halperin *et al.*, 2017). In brief, *whole-plant daily transpiration* was calculated as the difference between the load-cell at pre-dawn ( $W_m$ ) and in the evening ( $W_e$ ):

1. *Daily transpiration* =  $W_m - W_e$ ,

where  $W_m$  and  $W_e$  values were determined as the average load-cell reading of the specified time to eliminate the effect of temporal variation in ambient conditions.

The *plant weight gain* was calculated post-irrigation at the end of the drainage. This enabled determination of plant weight gain (fresh weight biomass) for any desired period. The plant daily weight gain ( $\Delta PW_n$ ) between consecutive days was calculated by:

2.  $\Delta PW_n = W_n - W_{n-1}$ ,

where  $W_n$  and  $W_{n-1}$  are the container weights after drainage on the following days,  $n$  and  $n-1$ , respectively.

The *whole-plant water-use efficiency* (WUE) during the well-watered period was determined by the ratio between the sum of the daily plant fresh-weight gain ( $\Delta PW$ ) and water consumed throughout this period:

3.  $WUE = \frac{\sum \Delta PW_n}{\sum \text{daily transpiration}_n}$

The WUE for the whole plant replaces the commonly used physiological WUE determined as the ratio between the accumulated CO<sub>2</sub> molecules and evaporated H<sub>2</sub>O. Determination of plant weight on a single day ( $PW_n$ ) throughout the drought period was calculated differently from equations 2 and 3. Since the pots did not drain and plant weight gain could not be separated from the container and the watering scheme, the following calculation was made:

$$4. \text{ Calculated plant weight} = WUE \times \text{daily transpiration}_n,$$

where  $WUE$  was calculated for the well-watered period and  $\text{daily transpiration}_n$  is the daily water consumption throughout the day (n). *Calculated plant weight gain* was determined by subtracting *calculated plant weight* from two consecutive days.

The *root water influx* was calculated by:

$$5. (J_r)_k \equiv - \left( \frac{d(SWC)}{dt} \right)_k \times V_s \cong \frac{SWC_k - SWC_{k-1}}{t_k - t_{k-1}} \times V_s,$$

where  $W_k$  and  $W_{k-1}$  were the readings at time  $t_k$  and  $t_{k-1}$ , respectively. Soil water content (SWC) in a pot was measured by the soil moisture sensor (5TE; Decagon Devices, Pullman, WA, USA), and  $V_s$  was the soil volume in the pot.

The *whole canopy conductance* ( $g_{sc}$  [mmol sec<sup>-1</sup> m<sup>-2</sup>]) was calculated by:

$$6. g_{sc} = \frac{\text{daily transpiration} \times P_{atm}}{PW \times VPD} = \frac{E \times P_{atm}}{VPD},$$

where  $P_{atm}$  was the atmospheric pressure (101.3 kPa). VPD was determined as the difference (in kPa) between saturation vapour pressure and actual vapour pressure of ambient air. Transpiration rate was normalized by leaf area ( $E$  [mmol sec<sup>-1</sup> m<sup>-2</sup>]).

#### *Phytotron experimental design and conditions*

Uniform seeds of Svevo and IL20 were placed on a moist germination paper (25 × 38 cm; Anchor Paper Co., St. Paul, MN, USA), about 2 cm apart, with the germ end facing down (*i.e.*, Cigar Roll method; Watt et al., 2013), and placed in a growth chamber (16°C). Four uniform seedlings were transplanted into pre-weighed 4L pots and thinned to 2 plants per pot after

establishment. The pots consisted of a soil mixture of 80% sandy loam and 20% peat. The pot surface was covered by a layer of vermiculite to prevent water evaporation from the pot surface. The experiment was conducted in the phytotron facility at the Faculty of Agriculture, Food and Environment, The Hebrew University, Israel. From seedling to tillering stage (Zadoks growth stage 23) plants were grown under short-day (8/16h) at 16/12°C (day/night) and then transferred to 22/16°C (day/night) conditions under natural sunlight. A complete randomized experimental design consisted of two genotypes (Svevo and IL20) and two water treatments (WW and TD), with 6 replicates for each combination (total 24 pots). Up to the tillering stage, all plants were grown under well-watered conditions. Under WW treatment, pots were irrigated above actual consumption, to allow some water to drain. Under TD treatment, drought was initiated at tillering stage and pots were irrigated with 50% of the actual water consumption of the WW treatment. Fertilization was utilized once in ~10 days during the water application, using 0.1% soluble fertilizer [20/20/20 (NPK)] including micro and macro elements (Ecogen, Jerusalem, Israel).

#### *Gas exchange measurements*

Plants were characterized for gas exchange parameters from the third leaf to grain filling (Zadoks growth stages 13, 21, 23, 33, 43, 65, and 85) using a portable infra-red gas analyser (LI-6800XT; Li-Cor Inc., Lincoln, NE, USA) to obtain the carbon assimilation rate (A), transpiration rate (E), stomatal conductance (gs), and total conductance to water vapour ( $g_{tw}$ ). Measurements were conducted at the mid-portion of the youngest fully expanded leaf or flag leaf in the later phenological stages ( $n=5$ ). Photosynthetic photon flux density was set to 1500  $\mu\text{mol}/\text{m}^2$  and the  $\text{CO}_2$  reference concentration was set as the ambient (400 ppm). The seasonally average leaf water use efficiency ( $\text{WUE}_l$ ) was calculated as the slope of the linear regression between A and E for each genotype within water treatment. A parallelism test was used to statistically differentiate between the curves representing genotypes under a specific water treatment.

#### *Measurements of leaf stomatal density*

Stomatal density was determined using the rapid imprinting technique (Reich, 1984). Nail polish was applied to the adaxial side of the leaf, dried for 1 min, and then removed. Once it dried, the nail polish imprints were plated on glass coverslips and photographed under an



inverted microscope (Zeiss, Jena, Germany). Imprints from each genotype were sampled ( $0.54 \times 0.37$  cm width and length) in four biological and three technical replicates. The technical replicates represented different leaf parts within one leaf sample that had been manually counted for stomata number.

### *Statistical analyses*

The JMP<sup>®</sup> ver. 15 statistical package (SAS Institute, Cary, NC, USA) was used for statistical analyses unless specified otherwise. The longitudinal response was fitted for genotypes under each water treatment. Analysis of variance (ANOVA) was used within each day of the experiment to assess the first day of significant differences between the genotype within water treatment at the relative growth rate and daily transpiration dependent variables. Hourly basis graphs of normalized transpiration rate (E), whole canopy conductance ( $g_{sc}$ ), and root influx have been analysed within an hour on a specific day and tested for differences between genotypes in a t-test. The maximum canopy conductance and maximum root influx were determined from the mean of the last five days of maximum values within an hour ( $n=5$ ). The differences between genotypes were tested on an hourly basis with a t-test within water treatment.

The differences in gas exchange parameters: Assimilation rate (A), stomatal conductance ( $g_s$ ) and total conductance to water vapour ( $g_{tw}$ ) between the two genotypes under specific water treatment were tested using a t-test. The analysis was made from the booting stage (Zadoks stages 43), similarly to the lysimetric final phenological stage ( $n=5$ ). Genotypic differences in leaf water use efficiency ( $WUE_l$ ) under specific water treatment were obtained by fitting a linear curve between A and E and applying a parallelism test between the two lines. This linear trend was fitted from all gas exchange measurements throughout the season.

Structural equation model (SEM) analysis was performed using the JMP<sup>®</sup> ver. 15 statistical package and the package “Lavan” (Oberski, 2014) under RStudio 3.5.1 (RStudio Team, 2020) to test the dependent and independent variables associated with Genotype-atmospheric-water availability. For testing the model accuracy, we used the Chi-square ( $\chi^2$ ) test and Bentler’s comparative fit index (CFI), which provides additional guidance for determining model fit. Values greater than 0.90 are considered a good fit for the model (Bollen and Long, 1993; Hu and Bentler, 1999). The root mean square error of approximation (RMSEA), provides additional guidance for determining model fit, as values smaller than 0.10 are preferred (Bollen and Long, 1993; Hu and Bentler, 1999).

## Results

### *The higher root-to-shoot ratio of IL20 supports a greater growth rate under terminal drought*

We have identified a wild emmer introgression line (IL20) with unique adaptive characteristics of drought-induced root-to-shoot ratio alteration under water stress during the vegetative period (Bacher *et al.*, 2021). In this study, we used a high-throughput gravity lysimeter system to further characterize IL20 under terminal drought (TD), initiated during the developmental transition from vegetative to reproductive stage. Twelve-day-old plants (Zadoks growth stage 12; Zadoks *et al.*, 1974) were grown under well-watered (WW) treatment for 25 days. The reduction of water availability in the TD treatment was applied individually for each single pot on a daily basis, in order to normalize their water stress as expressed in volumetric water content (VWC) (Fig. 1A).

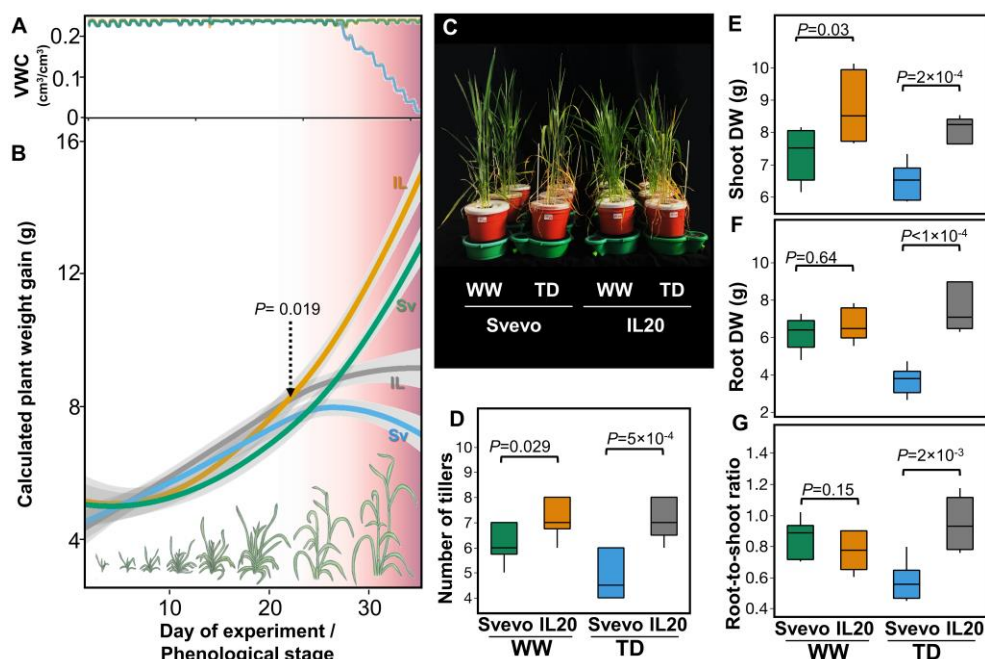

**Fig. 1.** Longitudinal weight gain and its distribution under contrasting water treatments. (A) Volumetric water content (VWC) and (B) calculated weight gain dynamics of Svevo (Sv) and IL20 (IL) under well-watered (WW) and terminal drought (TD) treatments along with the different wheat phenological stages. The increasing water-stress intensity is represented by the pink background colour intensity. The line curves represent the genotype mean within water treatment and day ( $n=5$ ). Shaded colours indicate the standard error. (C) Svevo and IL20 under contrasting water treatments on the last day of the experiment. (D) Number of tillers, (E) shoot dry weight (DW), (F) root dry weight, and (G) root-to-shoot ratio of the two genotypes under contrasting water treatments. Differences between genotypes within water treatment were analysed using a t-test ( $n=5$ ) at the last day of the experiment (35 days after transplanting).

In general, under WW treatment IL20 exhibited higher calculated weight gain compared with Svevo, although it was not significant ( $P \leq 0.05$ ) for every day (Supplementary Table S1). After initiating the water-stress treatment, IL20 maintained its growth rate over time as the stress intensity increased (Fig. 1B). The major divergence in calculated weight gain started at the stem elongation stage (34 in Zadoks growth scale) after 30 days ( $P=0.019$ ; Fig. 1B; Supplementary Table S1). IL20 maintained a lower and steady growth pattern (30-34 days) while Svevo presented a rapid decline in growth in response to water-stress.

Thirty-five days after transplanting (booting stage; 45 in Zadoks scale), Svevo showed strong visual symptoms of leaf rolling and leaf senescence, while IL20 showed milder symptoms (Fig. 1C). The plants were harvested and shoot and root dry weight (DW) were analysed. IL20 exhibited a significantly higher number of tillers and shoot DW under WW treatment ( $P=0.029$ , and  $P=0.032$ , respectively) compared to Svevo, and under TD ( $P=0.0005$ , and  $P=0.0002$ , respectively) (Fig. 1D, E). Root DW of IL20 was similar under WW and two-fold higher under TD ( $P \leq 1 \times 10^{-4}$ ) as compared with Svevo (Fig. 1F). Consequently, under TD IL20 exhibited a significantly higher root-to-shoot ratio ( $P=1 \times 10^{-3}$ ; Fig. 1G; Supplementary Table S2).

#### *IL20 exhibited higher whole canopy transpiration under terminal drought*

Under WW conditions, biomass accumulation is associated with a higher gas exchange rate (*i.e.*, assimilation rate, transpiration rate, and stomatal conductance). However, under terminal drought conditions, a relatively higher gas exchange rate may not directly translate into increased biomass accumulation. Using the gravity lysimeter system we were able to trace the genotypic response to TD by measuring daily transpiration and growth curves. IL20 exhibited significantly higher daily canopy transpiration compared with Svevo, as differences in the transpiration between the genotypes increased together with the increment of water-stress intensity (Fig. 2A; Supplementary Table S3). Notably, daily transpiration dynamics under TD showed a similar pattern as found for calculated weight gain (Figs. 1B and 2A). Since a larger canopy is associated with greater transpiration, we normalized the transpiration to the plant weight ( $E$ ; g water/g plant). We tested the daily  $E$  patterns for each genotype between water treatments and observed that, under TD, IL20 was able to maintain higher  $E$  than Svevo as water-stress intensified. Svevo showed a decline during the last five days of severe water-

stress. Notably, under WW treatment the E pattern of both genotypes was comparable in the experiment window (Fig. 2B, C).

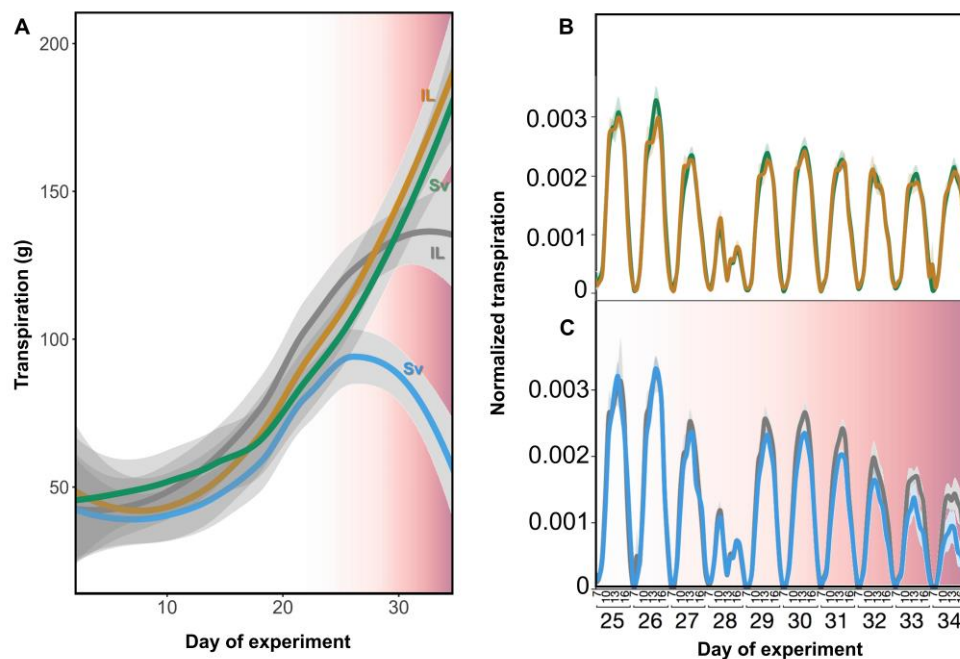

**Fig. 2.** Transpiration dynamics of Svevo (Sv) and IL20 (IL) under well-watered (WW) and terminal drought (TD) treatments. (A) Daily transpiration dynamics along with the experiment. The increasing drought intensity is represented with the pink background colour intensity. Hourly dynamics of normalized transpiration rate of Svevo and IL20 under (B) WW and (C) TD. The line curves represent the genotype means ( $n=5$ ) within water treatment, and shaded colours indicate the standard error.

### *IL20 exhibited a higher and longer period of whole canopy conductance*

To better understand the factors contributing to higher E values under TD of IL20 compared with Svevo, we characterized flag leaf stomatal density under two water treatments. We hypothesized that higher stomatal density can be directly associated with higher E. In contrast, the results indicated that the genotypes had similar stomatal density under both water treatments and that the water stress did not have any effect (Supplementary Fig. S2). Given no stomatal density differences, we hypothesized that there might be a difference in stomatal conductance in response to atmospheric parameters (Radiation and VPD) that may increase the transpiration use efficiency of IL20. To test this hypothesis, we focused on whole canopy conductance ( $g_{sc}$ ) on an hourly scale during the day. Our results suggest that under TD,  $g_{sc}$  of both genotypes peak before maximum radiation, with IL20 exhibiting significantly higher  $g_{sc}$  compared with Svevo along with the increased intensity of water-stress (Fig. 3A). Moreover, the gap between IL20  $g_{sc}$  compared with Svevo gets bigger as water-stress intensity increases. For example, on the 29<sup>th</sup> day, the genotypic differences in  $g_{sc}$  were found between 10:00-12:00 while on the 34<sup>th</sup>

day the differentiation started as early as 07:00 and lasted until 14:00. To further explore the hourly  $g_{sc}$  dynamics, we focused on the last five days of the experiment (days 29-34) when the water stress was the most severe and calculated the hourly maximum  $g_{sc}$  within each day. This analysis yielded genotypic differences in diurnal  $g_{sc}$  under TD. While under WW treatment there were no differences between the genotypes, under TD IL20 exhibited ~50% higher  $g_{sc}$  capacity compared with Svevo between 8:00-09:00 AM. In addition, most of the  $g_{sc}$  differences between the genotypes occurred in the morning time (07:00-10:00 AM), when VPD is low. (Fig. 3B-C).

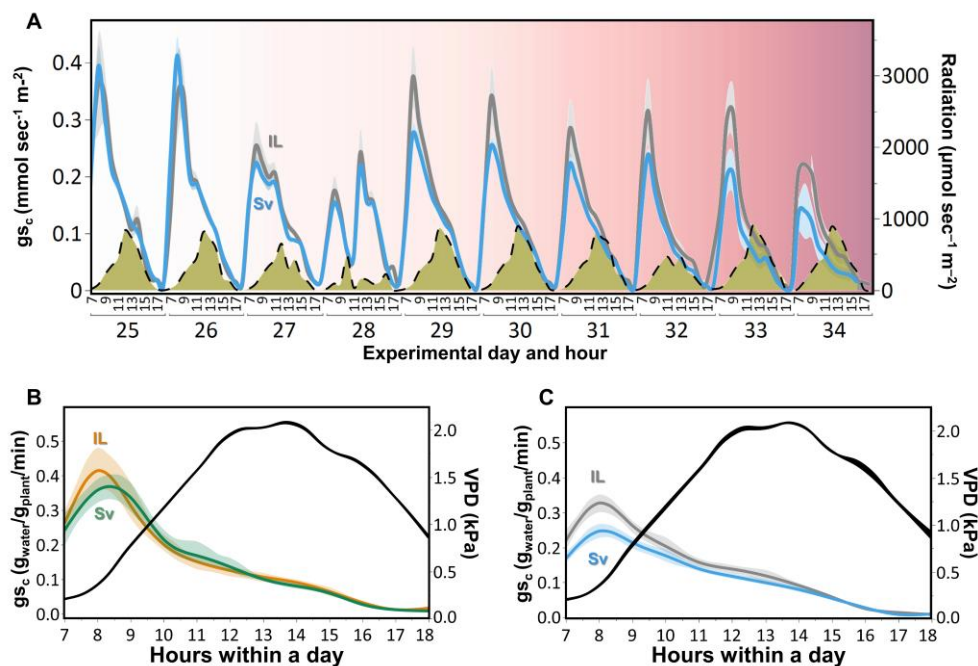

**Fig. 3.** Diurnal dynamics of whole canopy conductance ( $g_{sc}$ ) of Svevo (Sv) and IL20 (IL) under well-watered (WW) and terminal drought (TD) treatments. (A) Svevo and IL20 hourly  $g_{sc}$  dynamics together with the natural light radiation curve (yellow). The increasing drought intensity is represented with the pink background colour intensity. The maximum hourly  $g_{sc}$  average was calculated from the last five days (30-34) of the experiment under (B) WW and (C) TD treatments. The hourly vapour pressure deficit (VPD) is represented by the black curve. The genotype curves represent the genotype means ( $n=5$ ) within water treatment, day, and hour. Shaded colours indicate the standard error.

*IL20 exhibited a higher gas exchange rate and leaf water use efficiency under water-stress*

To better understand the  $g_{sc}$  diel dynamics under TD, we tested the leaf gas exchange rate and extracted the leaf water use efficiency (A/E;  $WUE_l$ ) for both genotypes. We hypothesized that IL20 will exhibit higher  $WUE_l$  in response to water stress. Under both water treatments, IL20 gas exchange was higher compared with Svevo (booting stage) in the significance range of  $P=0.03-0.06$  (Fig. 4A-F, Supplementary Table S4) and exhibited higher  $WUE_l$  in response to

TD ( $P \leq 1 \times 10^{-4}$ ) (Fig. 3G, H, Supplementary Table S5); total conductance to water vapour ( $g_{tw}$ ) was higher than Svevo under both water treatments (Fig. 4E, F).

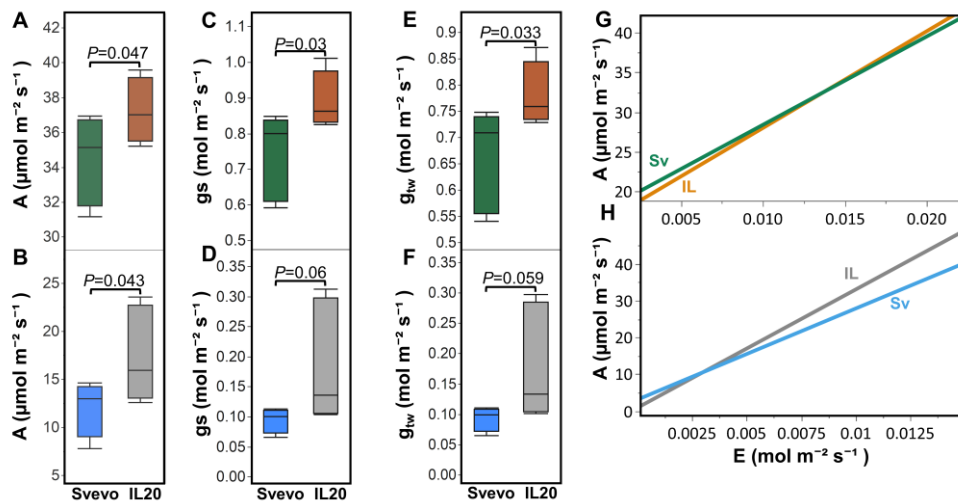

**Fig. 4.** Leaf gas exchange and water use efficiency of Svevo (Sv) and IL20 (IL) under well-watered (WW) and terminal drought (TD) treatments. (A, B) Assimilation rate (A), (C, D) stomatal conductance ( $g_s$ ) and (E, F) total conductance to water vapour ( $g_{tw}$ ) under WW and TD, respectively. Leaf water use efficiency (A/E) under (G) WW and (H) TD. Differences between genotypes within water treatment were analysed using a t-test ( $n=5$ ).

#### *IL20 exhibited higher root influx at an earlier time of day under terminal drought*

Next, we hypothesized that the ability of IL20 to maintain higher gas exchange under TD, alongside its higher root-to-shoot ratio, may suggest better water extraction from the soil. To test this hypothesis, we analysed the daily and hourly longitudinal root influx of the two genotypes. In general, under both water treatments, IL20 had a higher root influx compared with Svevo, although, under TD, IL20 maintained its root influx rate, as Svevo root influx decreased as water-stress intensified (Fig. 5A, Supplementary Fig. S3). To capture the hourly differences during the most intense phase of water stress, we averaged the daily maximum influx per hour for each genotype during the last five days. Under WW, a similar daily pattern was observed between the genotypes where IL20 maintained a higher root influx throughout the day (Fig. 5B). Under TD, IL20 exhibited a higher root influx compared with Svevo, mainly during the morning hours (07:00-12:00) when VPD was relatively lower (Fig. 5C; Supplementary Video S1). This phenomenon can support lower water loss per unit of carbon assimilation under TD, derived from the combination of maximization root influx and  $g_{sc}$  in the early morning time when VPD is low.

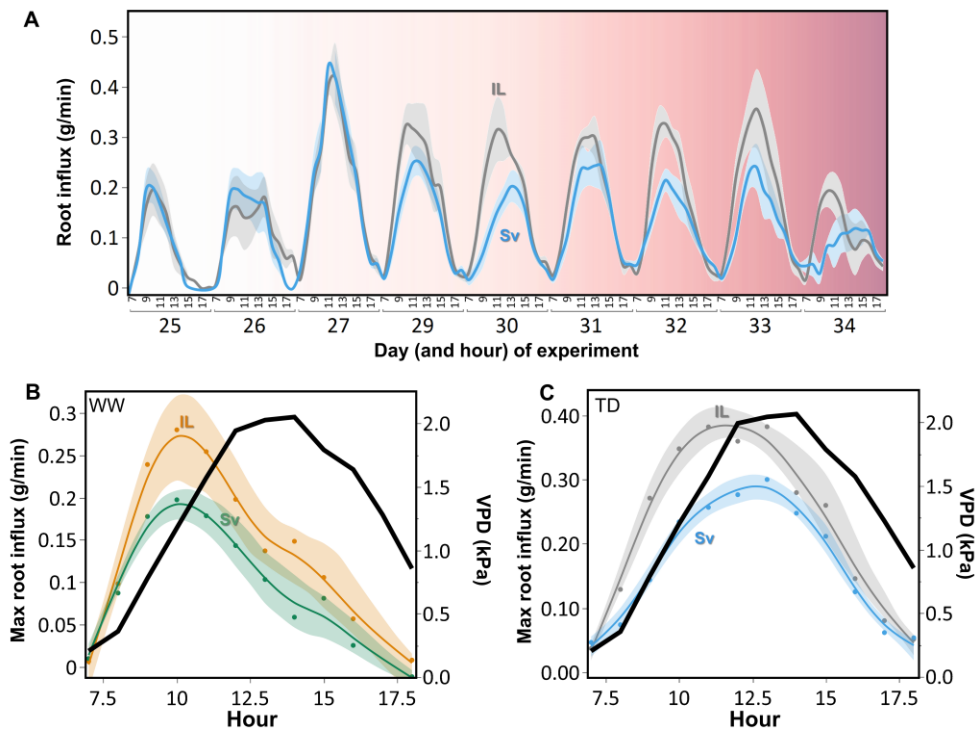

**Fig. 5.** Root influx dynamics of Svevo (Sv) and IL20 (IL) under well-watered (WW) and terminal drought (TD) treatments. (A) Hourly root influx dynamics throughout the increasing drought intensity. The increasing drought intensity is represented with the pink background colour intensity. The average maximum hourly root influx was calculated for the last 5 days (30-34) of the experiment under (B) WW and (C) TD treatments. Hourly vapour pressure deficit (VPD) is represented by the black line. The genotype curves represent the means ( $n=5$ ) within water treatment, day and hour. Shaded colours indicate the standard error.

*Structural equation modelling highlights the multidimensional interactions of genotypic-atmospheric-physiological factors under water-stress*

We next aimed to integrate the various dependent and independent effects of atmospheric and physiological variables by application of a structural equation modelling (SEM) statistical approach for multiple inter-correlated parameters. We assumed an initial path with two latent variables (atmospheric and physiological), representing a concept that one or more observed variables are presumed to be highly correlated with latent variables. The model fit report indicates that the path we suggested was a good fit ( $\chi^2=2.80$ ,  $P_{\text{Chisq}}=0.24$ , and  $\chi^2/\text{DF}=1.40$ ; Supplementary Table S6) according to the Hu and Bentler (1999) and Lomax and Schumacker (2012) methodology of evaluating models to the suggested path. All nine regressions were found significant, which proves the interrelations of genotype-water availability-atmospheric state (Fig. 6). Physiological and atmospheric endogenous variables had relatively high  $R^2$  values while the latent variable of physiology had lower values ( $R^2=0.23$ ) that may result from the multi-dimensionality of diurnal physiological response to the atmospheric cues

(Supplementary Table S7). The genotypic factor (fundamental factor) has a significant effect on physiological traits (latent variable) and VWC. (Supplementary Table S8). Interestingly, VPD and radiation presented opposite effects on plant water intake and loss. While VPD had a negative effect on transpiration rate,  $g_{sc}$  and root influx, radiation had a positive influence. Notably, root influx was less affected by radiation compared with  $g_{sc}$  and transpiration rate.

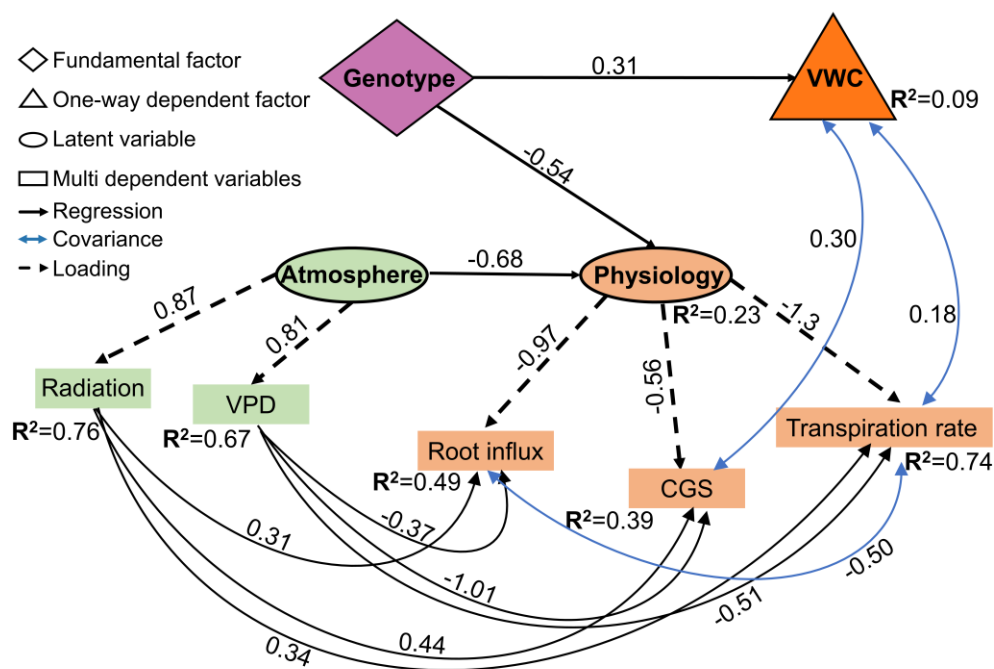

**Fig. 6.** Scheme of the genetic-physiological-atmospheric network path under water-stress. Black and solid one-directional arrows represent standardized parameter estimates for regressions, and dashed arrows represent the loadings standardized parameter estimates. The blue two-directional arrows represent the standardized parameter estimates for covariance and  $R^2$  for the endogenous variables. Only significant paths are presented ( $P \leq 0.05$ ).

## Discussion

The unpredictable and fluctuating atmospheric conditions associated with present and projected climate change pose a challenge for wheat cultivation and improvement. Under such conditions, developmental plasticity is an essential adaptive mechanism to promote future production (Gray and Brady, 2016). Phenotypic plasticity in the root-to-shoot ratio can support productiveness under water stress as plant growth potential reduces and root growth is favoured over the shoot to limit evaporation and extract water residuals (Reich, 2002; Correa *et al.*, 2019). Wheat breeding has focused on aboveground traits, and root system response to water stress has been less studied. Therefore, new genetic sources for expanding the range of root-



to-shoot ratio can be valuable. Recently, we identified a novel mechanism for a drought-induced root-to-shoot shift from wild emmer wheat. Here we harness this adaptive wild introgression line to elucidate the advantage in promoting higher responsiveness to water and atmospheric state by synchronizing the diurnal water usage. This soil–plant–atmosphere continuum response results in higher transpiration use efficiency and mediates the wheat water influx continuum under terminal drought.

Our findings show that the elite cultivar Svevo exhibited a significant reduction in shoot and root DW [-12% ( $P=0.055$ ) and -41% ( $P=0.0003$ ), respectively] which resulted in a 33% reduction of root-to-shoot ratio. In contrast, IL20 showed a milder reduction in shoot DW (-8%;  $P=0.18$ ) and non-significant increment in root DW (+11%,  $P=0.11$ ), which resulted in a 21% increase in root-to-shoot ratio (Fig. 1). Accordingly, IL20 exhibited significantly greater whole-plant transpiration and root influx (Figs. 2 and 5). It has been suggested that under rainfed Mediterranean agro-systems, limiting the vegetative growth (*i.e.*, transpiration rate) is a desirable trait as it can preserve more soil moisture for the reproductive phase (Passioura, 1983). Therefore, we can expect that the higher biomass of IL20 will have a negative effect during the progression of stress and increasing drought intensity. However, while Svevo showed a significant reduction in biomass accumulation with increasing stress intensity, IL20 was able to maintain growth (Fig. 1A-B). This advantage of IL20 is expressed in its ability to maintain greater transpiration and  $g_{sc}$  under TD (Figs. 2, 3).

Transpiration efficiency (TE) is a key adaptive trait under semi-arid conditions (Collins et al., 2021) that can be regulated by the stomatal response to water stress and environmental state. In WW treatment both genotypes exhibited similar  $g_{sc}$  before VPD reached its peak (*i.e.*, mid-day); under TD, IL20 exhibited greater  $g_{sc}$  early in the morning (07:00-10:00 AM) compared with Svevo (Fig. 3C). This advantage of IL20 under lower VPD promotes higher TE. In addition, IL20 increased its  $WUE_l$  in response to TD. These results agree with Leakey *et al.* (2019), suggesting that a higher response of  $WUE_l$  to VPD may indicate diurnal/spatial sensitivity to environmental factors, although the physiological source of this hyper-responsiveness (rather in the shoot or root tissue) is not yet known. The ability of plants to support higher gas exchange under low VPD during a preferable time window (*i.e.*, early morning), could be coupled with increasing water potential and could promote root growth under drought (Quarrie and Jones, 1979). IL20's higher maximal root influx under both water treatments (Fig. 5A, Supplementary Fig. S3), as expressed also in its advantage in transpiration over Svevo (Fig. 2A), is associated with its larger root and shoot biomass, but does not explain the diurnal root water uptake differences between the genotypes. Characterizing these trends

suggests that while IL20 was able to maintain its maximal root influx early in the morning, Svevo's root influx was delayed and reached its peak an hour later coinciding with the atmospheric VPD peak (Fig. 5B, C). This early water flux could enable IL20 to adjust its diurnal transpiration pattern to the atmospheric conditions, which would result in higher TE under TD. This mechanism suggests that wild alleles offer a new strategy to improve TE without the well-accepted concept of reducing plant size under drought (see Vadez *et al.*, 2014).

Maximizing the transpiration rate under a preferable atmospheric state has been suggested as a breeding target for drought-prone environments (Messina *et al.*, 2015). Previous studies have mainly focused on aboveground tissues, while belowground responsiveness to atmospheric cues has received less attention. To better understand the intra- and inter-relations between plant tissues and atmospheric parameters, we applied the structural equation modelling (SEM) approach. Segmentation of the physiological responses to water-stress indicates that leaf tissue is more responsive to the atmospheric state as expressed in gas exchange alterations. In contrast, the root influx was mostly affected by the VPD, presumably in response to the shoot stomatal closure. Accordingly, Fletcher *et al.* (2007) showed that soybean (*Glycine max*) assimilation and transpiration rates declined when atmospheric VPD increased in TD-adapted genotypes.

The co-occurrence of VPD and radiation makes it challenging to untangle their effects on plant physiological response to environmental conditions (Grossiord *et al.*, 2020). Our model enabled us to dissect these two parameters and showed that high VPD had a negative effect on the physiological performance, while radiation had a positive effect. More specifically, VPD had the most major negative effect on  $g_{sc}$  (Standardized estimate = -1.01), which resulted in lowering the transpiration rate and finally decreasing root influx. In contrast, radiation was positively correlated with  $g_{sc}$ , transpiration rate and root influx (Supplementary Table S8), suggesting that radiation has a smaller effect on root influx and total water balance.

### *Concluding remarks*

Under the semi-arid Mediterranean basin conditions, breeding drought-tolerant cultivars is based on their high sensitivity to atmospheric changes (Sadok and Tamang, 2019). Lopez *et al.* (2020) suggested that the most useful approach for understanding the VPD effect on plant physiological response will simultaneously examine traits that are expressed in the different organs and will link the physiological processes on a larger scale, based on models. We integrated these approaches and suggested that plants adaptation to water and atmospheric

stress is a combination of physiological response (alteration in root-to-shoot ratio) and increased transpiration efficiency by matching the plant water in/out fluxes to the early morning. Modelling the root and shoot tissue response to the atmospheric state indicated that breeding drought-tolerant (water and atmospheric) cultivars should be focused on leaf hypersensitive response to VPD and a more efficient root system that can increase influx and support higher gas exchange during suitable atmospheric conditions.

## Supplementary material

Supplementary data is available at JXB online.

- Fig. S1.** Daily and hourly atmospheric data throughout the experiment.
- Fig. S2.** Flag leaf stomatal number under well-watered and terminal drought treatments.
- Fig. S3.** Hourly root influx dynamics for the last nine days of the experiment under well-watered treatment.
- Video S1** Root influx daily diurnal dynamics of Svevo and IL20 under terminal drought treatment.
- Table S1.** The longitudinal growth rate of Svevo and IL20 under well-watered and terminal drought treatments.
- Table S2.** Morpho-physiological traits on the last day of the experiment.
- Table S3.** Longitudinal daily transpiration of Svevo and IL20 under well-watered and terminal drought treatments.
- Table S4.** Leaf gas exchange and water use efficiency under well-watered and terminal drought treatments.
- Table S5.** Leaf water use efficiency fit model and parallelism test.
- Table S6.** Structural equation model fit report.
- Table S7.** R<sup>2</sup> for the structural equation model endogenous variables.
- Table S8.** Structural equation model descriptive statistics. Standardized estimate variables under water-stress.

## Acknowledgments

We thank members of the Peleg lab for their helpful comments during the preparation of this manuscript. We thank Dr. R. Hayouka and E. Hendel for technical assistance with the experiments and Mrs. L. Shemesh for illustrating the wheat phenological stages. This study was partially supported by the State of Israel Ministry of Agriculture and Rural Development (grants # 20-10-0066; 12-01-0005), the U.S. Agency for International Development Middle East Research and Cooperation (grant # M34-037), and the Dutch Ministry of Foreign Affairs under Dutch development / foreign policy (Project WheatMAX).

## Author contributions

HB and ZP designed the experiments, HB and YS conducted the experiments, HB and ZP analyzed the data. HB, HW and ZP wrote the manuscript. All authors reviewed and approved the manuscript.

## Data availability

All data supporting the findings of this study are available within the paper and within its supplementary materials published online.

## References

- Anderson WK, French RJ, Seymour M.** 1992. Yield responses of wheat and other crops to agronomic practices on duplex soils compared with other soils in Western Australia. *Australian Journal of Experimental Agriculture* **32**, 963–970.
- Bacher H, Zhu F, Gao T, et al.** 2021. Wild emmer introgression alters root-to-shoot growth dynamics in durum wheat in response to water-stress. *Plant Physiology* **in press** (doi.org/10.1093/plphys/kiab292).
- Bollen, KA, Long JS.** 1993. *Testing Structural Equation Models*. California, USA: Sage.
- Caldeira, CF, Jeanguenin L, Chaumont F, Tardieu F.** 2014. Circadian rhythms of hydraulic conductance and growth are enhanced by drought and improve plant performance. *Nature Communications* **5**, 5365.
- Collins B, Chapman S, Hammer G, Chenu K.** 2021. Limiting transpiration rate in high

- evaporative demand conditions to improve Australian wheat productivity. *in silico* Plants **3**, diab006.
- Correa J, Postma JA, Watt M, Wojciechowski T.** 2019. Soil compaction and the architectural plasticity of root systems. *Journal of Experimental Botany* **70**, 6019-6034.
- Dalal A, Shenhar I, Bourstein R, Mayo A, Grunwald Y, Averbuch N, Attia Z, Wallach R, Moshelion M.** 2020. A telemetric, gravimetric platform for real-time physiological phenotyping of plant–environment interactions. *Journal of Visualized Experiments*, e61280.
- Fletcher AL, Sinclair TR, Hartwell Allen Jr L.** 2007. Transpiration responses to vapor pressure deficit in well watered ‘slow-wilting’ and commercial soybean. *Environmental and Experimental Botany* **61**, 145–151.
- Gray SB, Brady SM.** 2016. Plant developmental responses to climate change. *Developmental Biology* **419**, 64-77.
- Grossiord C, Buckley TN, Cernusak LA, Novick KA, Poulter B, Siegwolf RTW, Sperry JS, McDowell NG.** 2020. Plant responses to rising vapor pressure deficit. *New Phytologist* **226**, 1550–1566.
- Halperin O, Gebremedhin A, Wallach R, Moshelion M.** 2017. High-throughput physiological phenotyping and screening system for the characterization of plant-environment interactions. *The Plant Journal* **89**, 839-850.
- Hu L, Bentler PM.** 1999. Cutoff criteria for fit indexes in covariance structure analysis: Conventional criteria versus new alternatives. *Structural Equation Modeling: A Multidisciplinary Journal* **6**, 1–55.
- Ihsan MZ, El-Nakhlawy FS, Ismail SM, Fahad S.** 2016. Wheat phenological development and growth studies as affected by drought and late season high temperature stress under arid environment. *Frontiers in Plant Science* **7**, 795.
- Koevoets IT, Venema JH, Elzenga JT, Testerink C.** 2016. Roots withstanding their environment: exploiting root system architecture responses to abiotic stress to improve crop tolerance. *Frontiers in plant science* **7**, 1335.
- Leakey ADB, Ferguson JN, Pignou CP, Wu A, Jin Z, Hammer GL, Lobell DB.** 2019. Water use efficiency as a constraint and target for improving the resilience and productivity of C<sub>3</sub> and C<sub>4</sub> crops. *Annual Review of Plant Biology* **70**, 781–808.
- Lobell DB, Roberts MJ, Schlenker W, Braun N, Little BB, Rejesus RM, Hammer GL.** 2014. Greater sensitivity to drought accompanies maize yield increase in the U.S. Midwest. *Science* **344**, 516–519.
- Lomax RG, Schumacker RE.** 2012. *A Beginner’s Guide to Structural Equation Modeling*.

New York, USA: Routledge Academic.

- Lopez J, Way DA, Sadok W.** 2021. Systemic effects of rising atmospheric vapor pressure deficit on plant physiology and productivity. *Global Change Biology* **27**, 1704-1720.
- Mansfield TA, Hetherington AM, Atkinson CJ.** 1990. Some current aspects of stomatal physiology. *Annual review of plant biology* **41**, 55-75.
- Messina CD, Sinclair TR, Hammer GL, Curan D, Thompson J, Oler Z, Gho C, Cooper M.** 2015. Limited-transpiration trait may increase maize drought tolerance in the US corn belt. *Agronomy Journal* **107**, 1978–1986.
- Monteith JL.** 1995. A reinterpretation of stomatal responses to humidity. *Plant, Cell & Environment* **18**, 357-364.
- Nicotra AB, Atkin OK, Bonser SP, et al.** 2010. Plant phenotypic plasticity in a changing climate. *Trends in Plant Science* **15**, 684-692.
- Oberski D.** 2014. Lavaan.survey: An R package for complex survey analysis of structural equation models. *Journal of Statistical Software* **57**, 1-27.
- Passioura JB.** 1982. Water in the Soil-Plant-Atmosphere Continuum. *Physiological plant ecology II*, 5-33.
- Passioura JB.** 1983. Roots and drought resistance. *Developments in Agricultural and Managed Forest Ecology* **12**, 265–280.
- Quarrie SA, Jones HG.** 1979. Genotypic variation in leaf water potential, stomatal conductance and abscisic acid concentration in spring wheat subjected to artificial drought stress. *Annals of Botany* **44**, 323–332.
- Rashid MA, Andersen MN, Wollenweber B, Zhang X, Olesen JE.** 2018. Acclimation to higher VPD and temperature minimized negative effects on assimilation and grain yield of wheat. *Agricultural and Forest Meteorology* **248**, 119–129.
- Reich PB.** 2002. Root–shoot relations: optimality in acclimation and adaptation or the ‘Emperor’s new clothes’? In: Waisel Y, Eshel A, Kafkafi U, eds. *Plant roots: the hidden half*. New York: Marcel Dekker, 205–220.
- Reich PB.** 1984. Leaf stomatal density and diffusive conductance in three amphistomatous hybrid poplar cultivars. *New Phytologist* **98**, 231–239.
- RCore Team.** 2020. R: A language and environment for statistical computing. R Foundation for Statistical Computing, Vienna, Austria. <https://www.R-project.org>
- Sadok W, Tamang BG.** 2019. Diversity in daytime and night-time transpiration dynamics in barley indicates adaptation to drought regimes across the Middle-East. *Journal of Agronomy and Crop Science* **205**, 372–384.

- Sivasakthi K, Tharanya M, Kholová J, Muriuki RW, Thirunalasundari T, Vadez V.** 2017. Chickpea genotypes contrasting for vigor and canopy conductance also differ in their dependence on different water transport pathways. *Frontiers in Plant Science* **8**, 1663.
- Sperry JS, Hacke UG, Oren R, Comstock, JP.** 2002. Water deficits and hydraulic limits to leaf water supply. *Plant, Cell & Environment* **25**, 251-263.
- Tanner CB, Sinclair TR.** 1983. Efficient water use in crop production: research or re-search?. In: Taylor HM, Jordan WR, Sinclair TR, eds. *Limitations to efficient water use in crop production*. Madison, WI: ASA, CSSA, SSSA, 1-27.
- Turner NC.** 2004. Sustainable production of crops and pastures under drought in a Mediterranean environment. *Annals of Applied Biology* **144**, 139-147.
- Vadez V, Kholova J, Medina S, Kakkera A, Anderberg H.** 2014. Transpiration efficiency: new insights into an old story. *Journal of Experimental Botany* **65**, 6141-6153.
- Vandeleur RK, Sullivan W, Athman A, Jordans C, Gilliam M, Kaiser BN, Tyerman SD.** 2014. Rapid shoot-to-root signalling regulates root hydraulic conductance via aquaporins. *Plant, Cell & Environment* **37**, 520-538.
- Voss-Fels KP, Snowdon RJ, Hickey LT.** 2018. Designer roots for future crops. *Trends in Plant Science* **23**, 957–960.
- Zadoks JC, Chang TT, Konzak CF.** 1974. A decimal code for the growth stages of cereals. *Weed research* **14**, 415-421.
